# Supplementary material for: Formation and release behavior of iron corrosion products under the influence of bacterial communities in a simulated water distribution system
Source: Royal Society of Chemistry journal article supplement (doi:10.1039/c3em00544e), 2014-01-01
Supplement: c3em00544e.pdf [file c3em00544e.pdf]

## **Electronic Supplementary Information**

### **Formation and release behavior of iron corrosion products under the influence of bacterial community in simulated water distribution system**

Huifang Sun<sup>a</sup>, Baoyou Shi<sup>\*a</sup>, Darren A. Lytle<sup>b</sup>, Yaohui Bai<sup>a</sup>, Dongsheng Wang<sup>a</sup>

<sup>a</sup>State Key Laboratory of Environmental Aquatic Chemistry, Research Center for  
Eco-Environmental Sciences, Chinese Academy of Sciences, 18 Shuangqing Road,  
P.O. Box 2871, Beijing 100085, China

<sup>b</sup>United States Environmental Protection Agency, 26 W. Martin Luther King Dr,  
Cincinnati, OH, 45268, USA

\*Corresponding author: Tel./Fax: +86 10 62849138.

E-mail address: byshi@rcees.ac.cn.

**Electronic supplementary information. S1** Detailed procedures of the classification of top layer and inner layer corrosion scales

**Fig. S1:** Appearances of corroded cast iron coupon surfaces under raw or disinfected tap water conditions in ARs tests

**Fig. S2:** Turbidity of effluents with time under raw or disinfected tap water conditions in ARs tests

**Fig. S3:** Shannon-Wiener curves of bacterial community of samples under raw tap water condition in ARs tests

**Fig. S4:** Taxonomic classification of pyrosequences from the seven bacterial communities under raw tap water condition in ARs tests (a: in phylum level; b: in class level)

Relative sequence abundances of the 11 most abundant phyla (classes) found in the bacterial communities are shown. Sequences that could not be classified into any known group and the other smaller phyla (classes) (relative abundance < 0.1%) in amount are assigned as “Unclassified”.

**Fig. S5:** Shannon-Wiener curves of the four biofilm samples in an actual DWDS

**Table. S1.** Water sources and their main average water quality parameters of pipe samples from actual DWDS

**Table. S2.** Coverage and diversity indices of bacterial 16S rRNA gene libraries

**Electronic supplementary information. S1:** Detailed procedures of the classification of top layer and inner layer corrosion scales

The top layer was brown and relatively hard, and the inner layer was black and soft. The top layer was scraped slightly first from the cast iron coupons using a sterile spatula, until the color of the corrosion scales was black. Then the inner layer was scraped using another sterile spatula, until the corroded floor was observed. The top layer and inner layer was pulverized using agate mortar respectively, passed through a 150  $\mu\text{m}$  mesh sieve, and then vacuum-freeze-dried.

All of the operations (except vacuum-freeze-dried) were done in an anaerobic glove box.

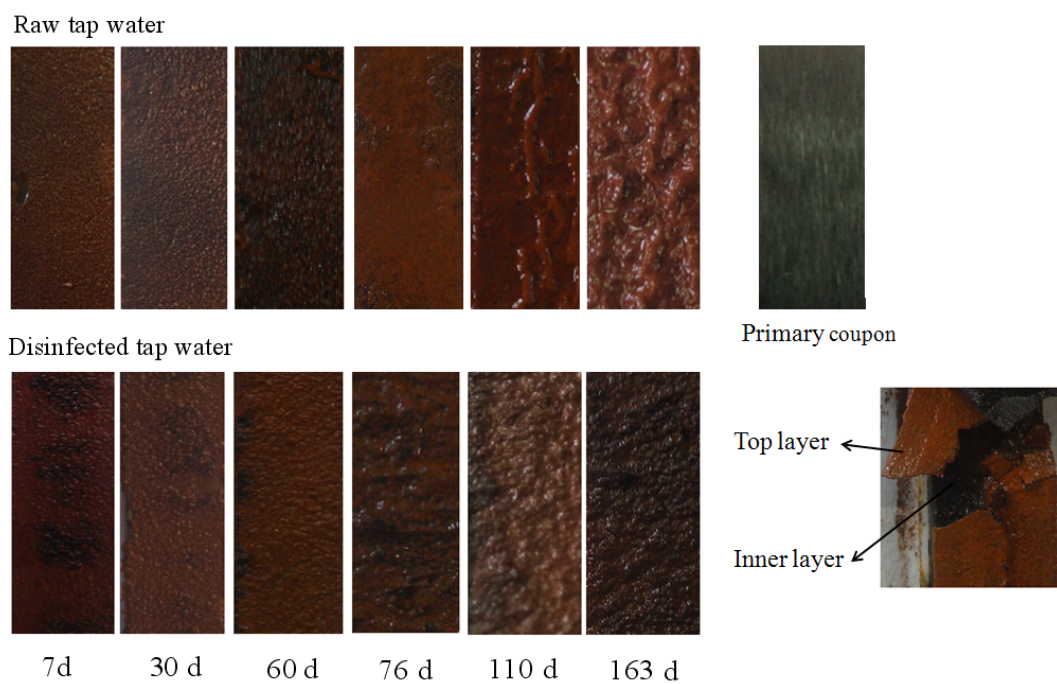

**Fig. S1** Appearances of corroded cast iron coupon surfaces under raw or disinfected tap water conditions in ARs tests

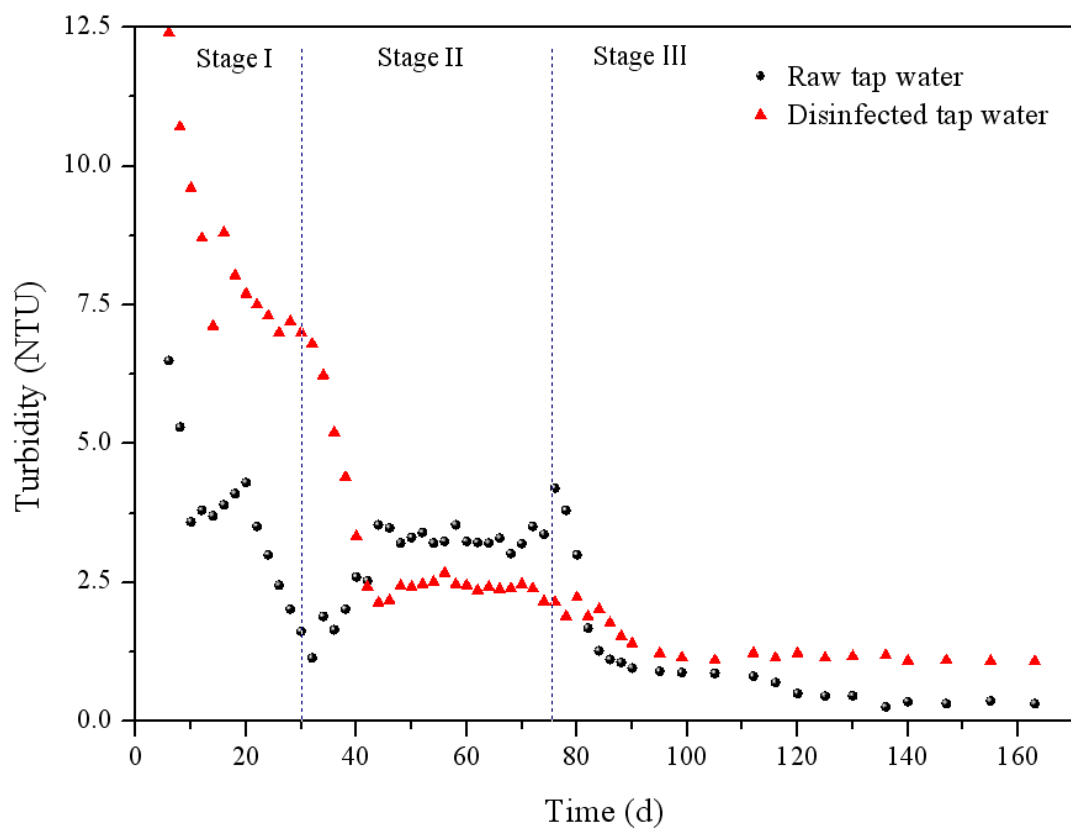

**Fig. S2** Turbidity of effluents with time under raw or disinfected tap water conditions in ARs tests

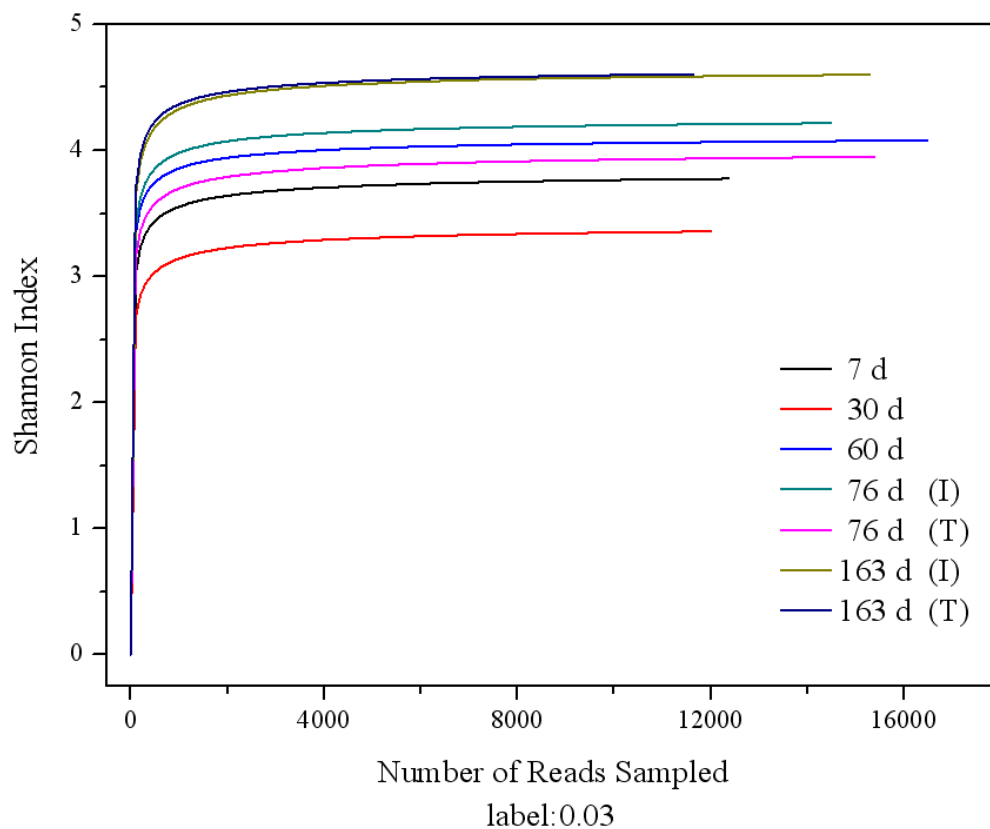

**Fig. S3** Shannon-Wiener curves of bacterial community of samples under raw tap water condition in ARs tests

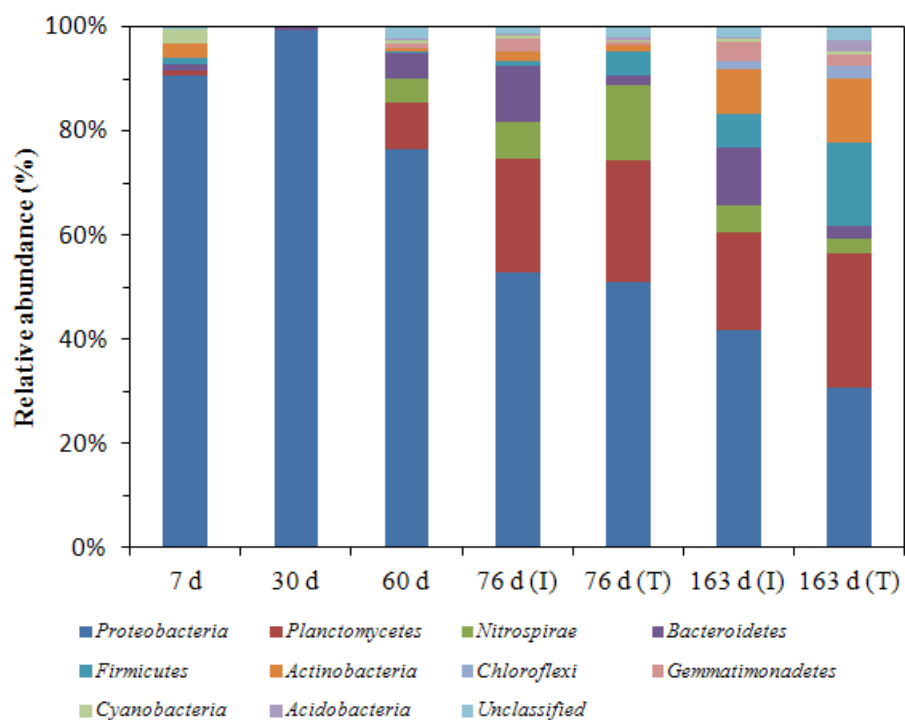

a

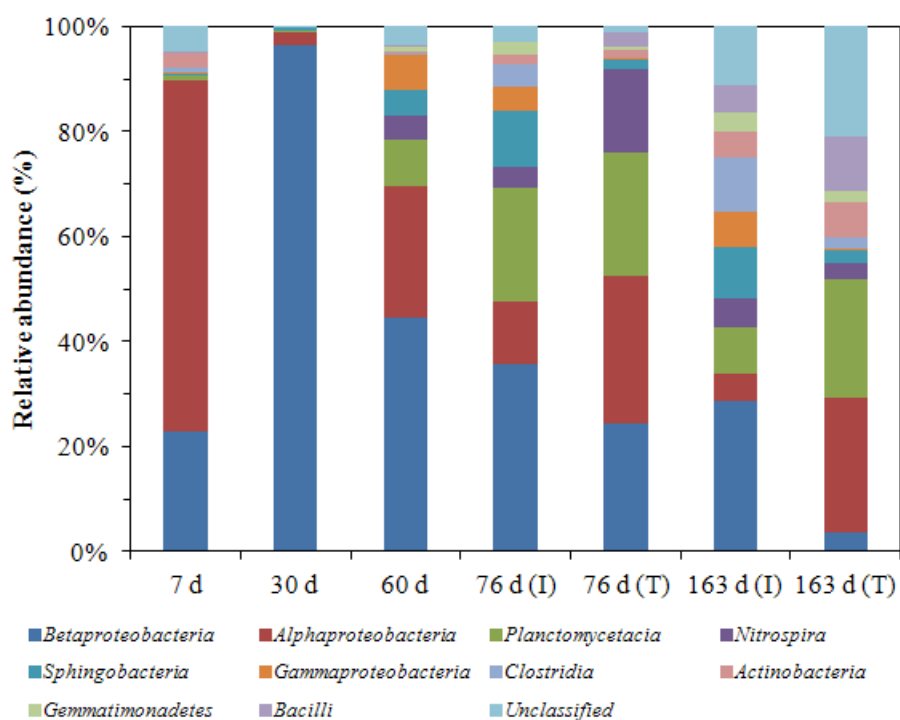

b

**Fig. S4** Taxonomic classification of pyrosequences from the seven bacterial communities under raw tap water condition in ARs tests (a: in phylum

level; b: in class level)

Relative sequence abundances of the 11 most abundant phyla (classes) found in the bacterial communities are shown. Sequences that could not be classified into any known group and the other smaller phyla (classes) (relative abundance < 0.1%) in amount are assigned as “Unclassified”.



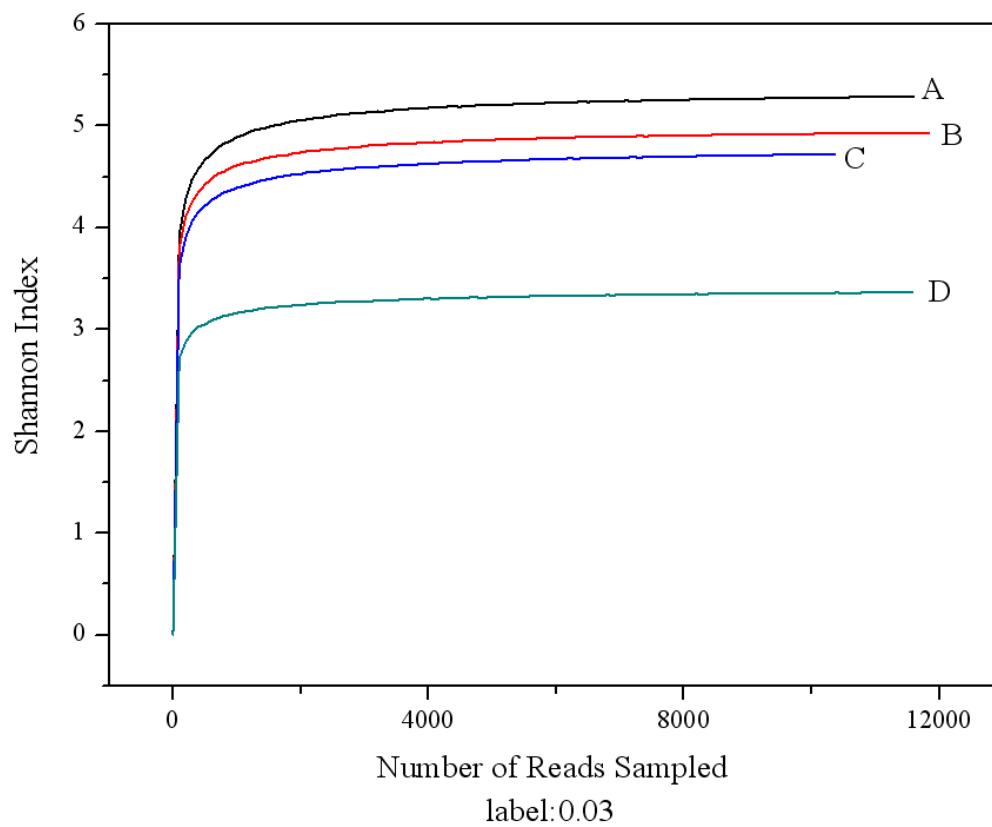

**Fig. S5** Shannon-Wiener curves of the four biofilm samples in an actual DWDS

**Table. S1** Water sources and their main average water quality parameters of pipe samples from actual DWDS

| Water source                                           | SW-1   | SW-2   | SW-3   | GW-1   | GW-2   |
|--------------------------------------------------------|--------|--------|--------|--------|--------|
| pH                                                     | 7.85   | 7.49   | 7.80   | 7.71   | 7.40   |
| Temperature (°C)                                       | 20     | 15     | 16     | 14     | 17     |
| Turbidity (NTU)                                        | 0.15   | 0.24   | 0.13   | 0.15   | 0.29   |
| Alkalinity (mg L <sup>-1</sup> CaCO <sub>3</sub> )     | 140    | 150    | 140    | 200    | 225    |
| Hardness (mg L <sup>-1</sup> CaCO <sub>3</sub> )       | 182    | 193    | 178    | 214    | 346    |
| Sulfate (mg L <sup>-1</sup> )                          | 39.8   | 33.9   | 41.6   | 22.0   | 38.1   |
| Chloride (mg L <sup>-1</sup> )                         | 17.7   | 17.3   | 21.1   | 16.4   | 15.0   |
| COD <sub>Mn</sub> (mg L <sup>-1</sup> O <sub>2</sub> ) | 1.4    | 0.95   | 0.87   | 0.55   | 0.55   |
| Fe (mg L <sup>-1</sup> )                               | <0.05  | 0.11   | <0.05  | <0.05  | <0.05  |
| Mn (mg L <sup>-1</sup> )                               | <0.001 | <0.001 | <0.001 | <0.001 | <0.001 |
| Cu (mg L <sup>-1</sup> )                               | <0.001 | 0.003  | <0.001 | 0.003  | 0.0001 |
| Zn (mg L <sup>-1</sup> )                               | <0.05  | 0.07   | <0.05  | <0.05  | <0.05  |
| Ca (mg L <sup>-1</sup> CaCO <sub>3</sub> )             | 104    | 110    | 113    | 125    | 213    |
| Mg (mg L <sup>-1</sup> CaCO <sub>3</sub> )             | 78     | 83     | 66     | 89     | 133    |

**Table. S2** Coverage and diversity indices of bacterial 16S rRNA gene libraries

| Samples    | Reads | OTU  | Ace  | Chao 1 | Coverage | Shannon | Simpson |
|------------|-------|------|------|--------|----------|---------|---------|
| 7 d        | 11555 | 632  | 1478 | 1089   | 0.972653 | 3.36    | 0.0983  |
| 30 d       | 5677  | 324  | 952  | 728    | 0.968645 | 3.00    | 0.1389  |
| 60 d       | 16491 | 768  | 1763 | 1264   | 0.977867 | 4.08    | 0.0416  |
| 76 d (I)*  | 14492 | 774  | 1283 | 1257   | 0.975711 | 4.21    | 0.0429  |
| 76 d (T)** | 15400 | 889  | 2224 | 1535   | 0.971104 | 3.95    | 0.0641  |
| 163 d (I)  | 15299 | 885  | 1786 | 1435   | 0.974966 | 4.60    | 0.0279  |
| 163 d (T)  | 11673 | 732  | 1804 | 1251   | 0.970267 | 4.60    | 0.0259  |
| A          | 11601 | 1175 | 2091 | 1849   | 0.958452 | 5.29    | 0.0184  |
| B          | 11834 | 1001 | 1879 | 1607   | 0.963580 | 4.93    | 0.0234  |
| C          | 10369 | 1004 | 2532 | 1828   | 0.951201 | 4.72    | 0.0333  |
| D          | 11582 | 642  | 1636 | 1166   | 0.972285 | 3.36    | 0.0975  |

( \*I: inner layer; \*\*T: top layer)
